# Supplementary material for: Suite of simple metrics reveals common movement syndromes across vertebrate taxa
Source: PubMed Central journal article supplement (PMC5452391; doi:10.1186/s40462-017-0104-2), 2017-06-01

## Sensitivity of results to lower temporal resolution of movement data

**Table S2.** Contributions of variables to and cumulative percentage of variance explained by principal components for movement data subsampled to 3-hour fix intervals.

|                                                    | <b>PC1</b>   | <b>PC2</b>   | <b>PC3</b>   | <b>PC4</b>   | <b>PC5</b>  |
|----------------------------------------------------|--------------|--------------|--------------|--------------|-------------|
| Turn Angle Correlation                             | 0.48         | 0.31         | -0.20        | -0.71        | 0.36        |
| Residence Time                                     | -0.47        | 0.39         | 0.54         | -0.00        | 0.57        |
| Time-to-Return                                     | 0.33         | -0.50        | 0.74         | -0.25        | 0.09        |
| Volume of Intersection                             | -0.54        | 0.12         | 0.04         | -0.61        | -0.56       |
| Maximum Net Squared Displacement                   | 0.38         | 0.69         | 0.32         | 0.24         | -0.46       |
| <b>Cumulative Percentage of Variance Explained</b> | <b>48.7%</b> | <b>70.7%</b> | <b>81.9%</b> | <b>93.4%</b> | <b>100%</b> |

**Table S3.** Summary of 130 individuals within 13 species analyzed into cluster classifications for movement data at hourly intervals and subsampled to 3-hour fix intervals.

| <i>Species</i>       | <i>N ind.</i> | <b>Mig. (1-hr)</b> | <b>Mig. (3-hr)</b> | <b>CPF (1-hr)</b> | <b>CPF (3-hr)</b> | <b>Nomad. (1-hr)</b> | <b>Nomad. (3-hr)</b> | <b>Ter. (1-hr)</b> | <b>Ter. (3-hr)</b> |
|----------------------|---------------|--------------------|--------------------|-------------------|-------------------|----------------------|----------------------|--------------------|--------------------|
| African buffalo      | 5             | -                  | -                  | -                 | -                 | 2                    | 3                    | 3                  | 2                  |
| African elephant     | 8             | -                  | -                  | 1                 | -                 | 4                    | 1                    | 3                  | 7                  |
| African wild dog     | 13            | -                  | -                  | 9                 | 7                 | 1                    | 1                    | 3                  | 5                  |
| Black-backed jackal  | 15            | -                  | -                  | 15                | 15                | -                    | -                    | -                  | -                  |
| California sea lion  | 15            | 1                  | 1                  | 14                | 5                 | -                    | 9                    | -                  | -                  |
| Cheetah              | 5             | -                  | -                  | -                 | -                 | -                    | -                    | 5                  | 5                  |
| Galapagos albatross  | 8             | -                  | -                  | 8                 | 6                 | -                    | 2                    | -                  | -                  |
| Galapagos tortoise   | 8             | 4                  | 4                  | 4                 | 4                 | -                    | -                    | -                  | -                  |
| Lion                 | 9             | -                  | -                  | 1                 | 2                 | 1                    | 3                    | 7                  | 4                  |
| N. elephant seal     | 15            | 15                 | 15                 | -                 | -                 | -                    | -                    | -                  | -                  |
| Plains zebra         | 9             | -                  | -                  | -                 | -                 | 6                    | 3                    | 3                  | 6                  |
| Springbok            | 10            | 2                  | -                  | 4                 | 5                 | 4                    | 5                    | -                  | -                  |
| White-backed vulture | 10            | -                  | -                  | 2                 | 7                 | 3                    | 2                    | 5                  | 1                  |
| <b>TOTAL</b>         | <b>130</b>    | <b>22</b>          | <b>20</b>          | <b>58</b>         | <b>51</b>         | <b>21</b>            | <b>29</b>            | <b>29</b>          | <b>30</b>          |

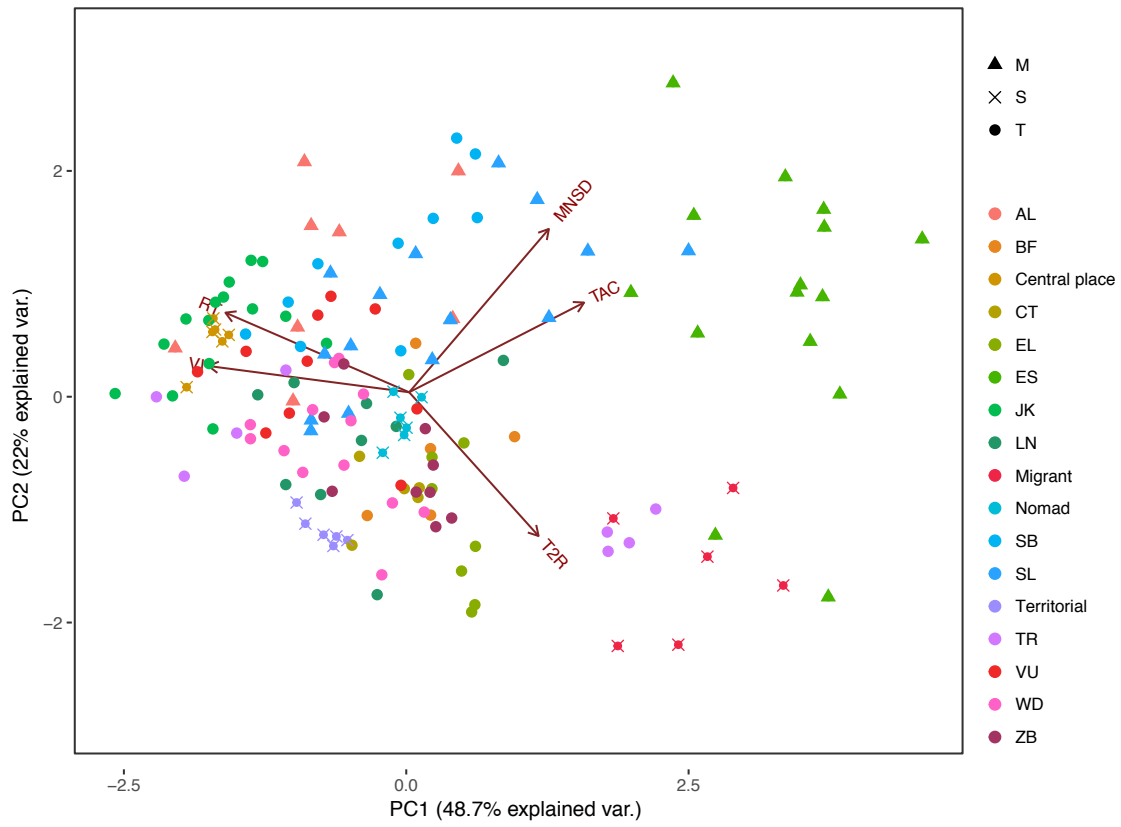

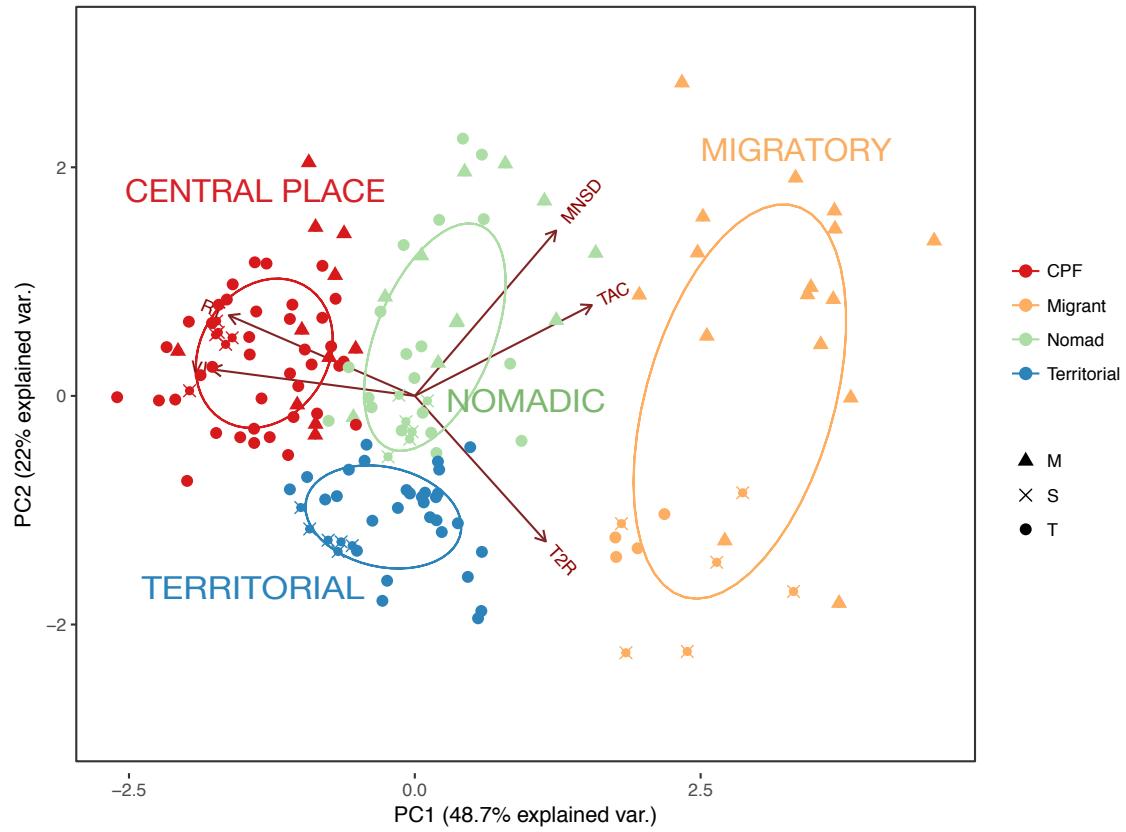

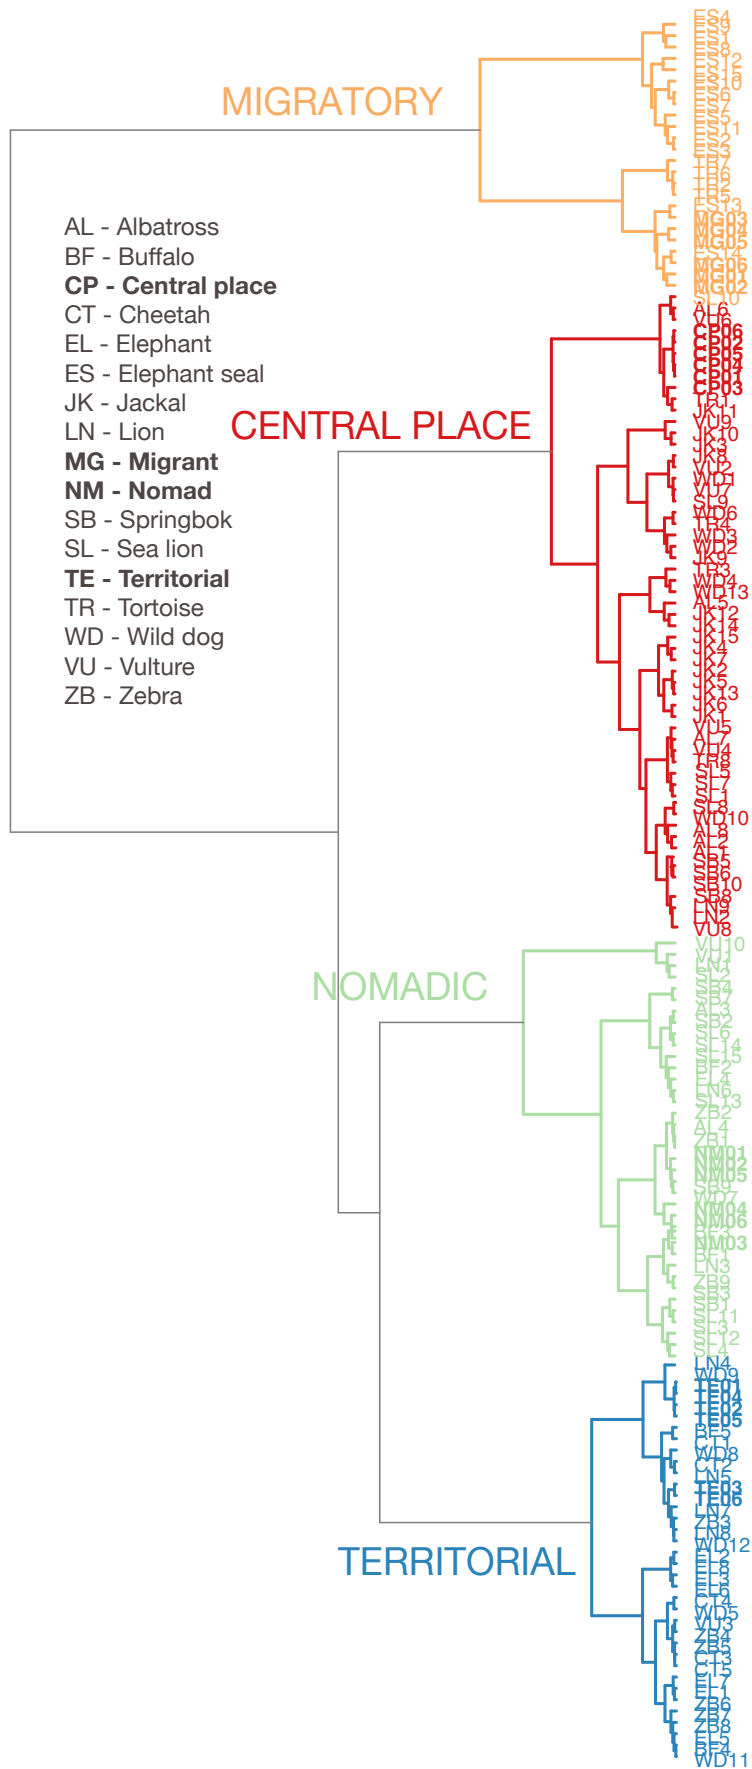

Supplement: 40462_2017_104_MOESM4_ESM.pdf [file 40462_2017_104_MOESM4_ESM.pdf]
