# Supplementary material for: Suite of simple metrics reveals common movement syndromes across vertebrate taxa
Source: PubMed Central journal article supplement (PMC5452391; doi:10.1186/s40462-017-0104-2), 2017-06-01
Supplement: 40462_2017_104_MOESM1_ESM.pdf [file 40462_2017_104_MOESM1_ESM.pdf]

**Table S1.** Summary and sources of GPS data used in analyses.

| Species              | Unit Type | N individuals   | Duration (mo.) | Fix interval pre-processing | Fix interval post-processing | Total fixes post-processing | Source                                                        |
|----------------------|-----------|-----------------|----------------|-----------------------------|------------------------------|-----------------------------|---------------------------------------------------------------|
| African buffalo      | GPS       | 5               | 5 ± 2.2        | 1-hour                      | 1-hour                       | 11197                       | Bar-David <i>et al.</i> 2009                                  |
| African elephant     | GPS       | 8               | 17.5 ± 5.2     | 20-minute                   | 1-hour                       | 93583                       | Unpublished <sup>3</sup>                                      |
| African wild dog     | GPS       | 13 (1 per pack) | 7 ± 2.3        | 5-minute                    | 1-hour                       | 55675                       | Unpublished <sup>2</sup> , but see Abrahms <i>et al.</i> 2016 |
| Black-backed jackal  | GPS       | 15              | 9.4 ± 4.7      | 1-hour                      | 1-hour                       | 98678                       | Bellan <i>et al.</i> 2012                                     |
| California sea lion  | ARGOS     | 15              | 2.4 ± 0.3      | variable                    | 1-hour                       | 26416                       | Unpublished <sup>1</sup>                                      |
| Cheetah              | GPS       | 5               | 7 ± 3.6        | 5-minute                    | 1-hour                       | 25421                       | Unpublished <sup>2</sup> , but see Wilson <i>et al.</i> 2013  |
| Galapagos albatross  | GPS       | 8               | 3 ± 0.9        | 1.5-hour                    | 1-hour                       | 16979                       | Dodge <i>et al.</i> 2013                                      |
| Galapagos tortoise   | GPS       | 8               | 18 ± 2.7       | 1-hour                      | 1-hour                       | 103621                      | Blake <i>et al.</i> 2012                                      |
| Lion                 | GPS       | 9               | 7 ± 3.3        | 5-minute                    | 1-hour                       | 41278                       | Unpublished <sup>2</sup>                                      |
| N. elephant seal     | ARGOS     | 15              | 7.5 ± 0.5      | variable                    | 1-hour                       | 64281                       | Robinson <i>et al.</i> 2012                                   |
| Springbok            | GPS       | 10              | 8.7 ± 2.3      | 1-hour                      | 1-hour                       | 59593                       | Lyons, Turner & Getz 2013                                     |
| White-backed vulture | GPS       | 10              | 8.5 ± 4.9      | 10-minute                   | 1-hour                       | 30454                       | Spiegel, Getz & Nathan 2013                                   |
| Plains zebra         | GPS       | 9               | 11.8 ± 3.1     | 20-minute                   | 1-hour                       | 67829                       | Unpublished <sup>3</sup>                                      |

<sup>1</sup>Daniel P. Costa, Department of Ecology and Evolutionary Biology, University of California-Santa Cruz, costa@ucsc.edu

<sup>2</sup>Alan M. Wilson, Structure & Motion Lab, Royal Veterinary College, University of London, awilson@rvc.ac.uk

<sup>3</sup>Wayne Getz, Department of Environmental Science, Policy, and Management, University of California-Berkeley, wgetz@berkeley.edu

## Citations

Abrahms B, Jordan NR, Golabek KA, McNutt JW, Wilson AM, Brashares JS. Lessons from integrating behaviour and resource selection: activity-specific responses of African wild dogs to roads. *Animal Conservation*. 2016;19:247–55.

Bar-David S, Bar-David I, Cross PC, Ryan SJ, Knechtel CU, Getz WM. Methods for assessing movement path recursion with application to African buffalo in South Africa. *Ecology*. 2009;:1–13.

Bellan SE, Cizauskas CA, Miyen J, Ebersohn K, Küsters M, Prager KC, et al. Black-backed jackal exposure to rabies virus, canine

distemper virus, and *Bacillus anthracis* in Etosha National Park, Namibia. *Journal of Wildlife Diseases*. 2012;48:371–81.

Blake S, Yackulic CB, Cabrera F, Tapia W, Gibbs JP, Kümme F, et al. Vegetation dynamics drive segregation by body size in Galapagos tortoises migrating across altitudinal gradients. Fryxell J, editor. *J Anim Ecol*. 2012;82:310–21.

Dodge S, Bohrer G, Weinzierl R, Davidson SC, Kays R, Douglas D, et al. The environmental-data automated track annotation (Env-DATA) system: linking animal tracks with environmental data. *Mov Ecol. BioMed Central*; 2013;1:3.

Lyons AJ, Turner WC, Getz WM. Home range plus: a space-time characterization of movement over real landscapes. *Mov Ecol*. 2013;1:1–14.

Robinson PW, Costa DP, Crocker DE, Gallo-Reynoso JP, Champagne CD, Fowler MA, et al. Foraging Behavior and Success of a Mesopelagic Predator in the Northeast Pacific Ocean: Insights from a Data-Rich Species, the Northern Elephant Seal. Klimley AP, editor. *PLoS ONE*. 2012;7:e36728–13.

Spiegel O, Getz WM, Nathan R. Factors Influencing Foraging Search Efficiency: Why Do Scarce Lappet-Faced Vultures Outperform Ubiquitous White-Backed Vultures? *Am Nat*. 2013;181:E102–15.

Wilson AM, Lowe JC, Roskilly K, Hudson PE, Golabek KA, McNutt JW. Locomotion dynamics of hunting in wild cheetahs. *Nature*. Nature Publishing Group; 2013;498:185–9.
